# Supplementary material for: Towards a ‘clicked’ PSMA targeting gene delivery bioconjugate-polyplex for prostate cancer
Source: Royal Society of Chemistry journal article supplement (doi:10.1039/d4ra03640a), 2024-01-01
Supplement: d4ra03640a1.pdf [file d4ra03640a1.pdf]

## Towards a 'clicked' PSMA Targeting Gene Delivery Bioconjugate-Polyplex for Prostate Cancer

Amanda R. Noble<sup>1</sup>, Saeed Akkad<sup>1</sup>, Nicholas D. J. Yates<sup>1</sup>, James M. Jeffries<sup>1</sup>, Nathalie Signoret<sup>2\*</sup> and Martin A. Fascione<sup>1\*</sup>

<sup>1</sup>Department of Chemistry, University of York, Heslington, York, YO10 5DD, UK. <sup>2</sup>Hull York Medical School, University of York, YO10 5DD

### Supporting Information

All chemicals, unless otherwise stated, were obtained from commercial sources. 1D NMR spectra were recorded on a Bruker Advance Neo 700 MHz spectrometer. <sup>1</sup>H NMR chemical shifts reported (in ppm) are relative to HOD ( $\delta$  4.79) with D<sub>2</sub>O as the solvent. High Performance Liquid Chromatography-Electrospray Ionization Mass Spectrometry (HPLC-MS) analysis of peptides was performed using a Dionex UltiMate<sup>®</sup> 3000 Ci Rapid Separation LC system equipped with an UltiMate<sup>®</sup> 3000 photodiode array detector probing at 250–400 nm, coupled to a HCT ultra ETD II (Bruker Daltonics) ion trap spectrometer, using Chromeleon<sup>®</sup> 6.80 SR12 software (ThermoScientific), esquireControl version 6.2, Build 62.24 software (Bruker Daltonics), and Bruker compass HyStar 3.2-SR2, HyStar version 3.2, Build 44 software (Bruker Daltonics) at the Centre of Excellence in Mass Spectrometry, York. All mass spectrometry was conducted in positive ion mode. Data analysis was performed using ESI Compass 1.3 DataAnalysis, Version 4.1 software (Bruker Daltonics). Samples were chromatographically analysed using a ThermoScientific C18, 2.6  $\mu$  (50 mm  $\times$  2.1 mm, ThermoScientific). Samples were prepared in 1 : 1 water : acetonitrile + 1% (v/v) formic acid. Water, 0.1% formic acid by volume (solvent A), and acetonitrile, 0.1 % formic acid (solvent B) were used as the mobile phase at a flow rate of 0.3 mL min<sup>-1</sup> at 30°C. A multistep gradient of 13.0 min was programmed as follows: 5% B for 0 min, a linear gradient to 10% B over 1 min, a linear gradient to 30% B over 1 min, a linear gradient to 50% B over 2 min, a linear gradient to 90% over 1 min, 90% B for 5 min, linear gradient to 5% B over 1 min, 5% B for 2 min. Note that the multistep gradient finishes in 5% B in order to re-equilibrate the column.

## Supplementary Figure 1, Synthesis of Fluorescent anti-PSMA peptide 1

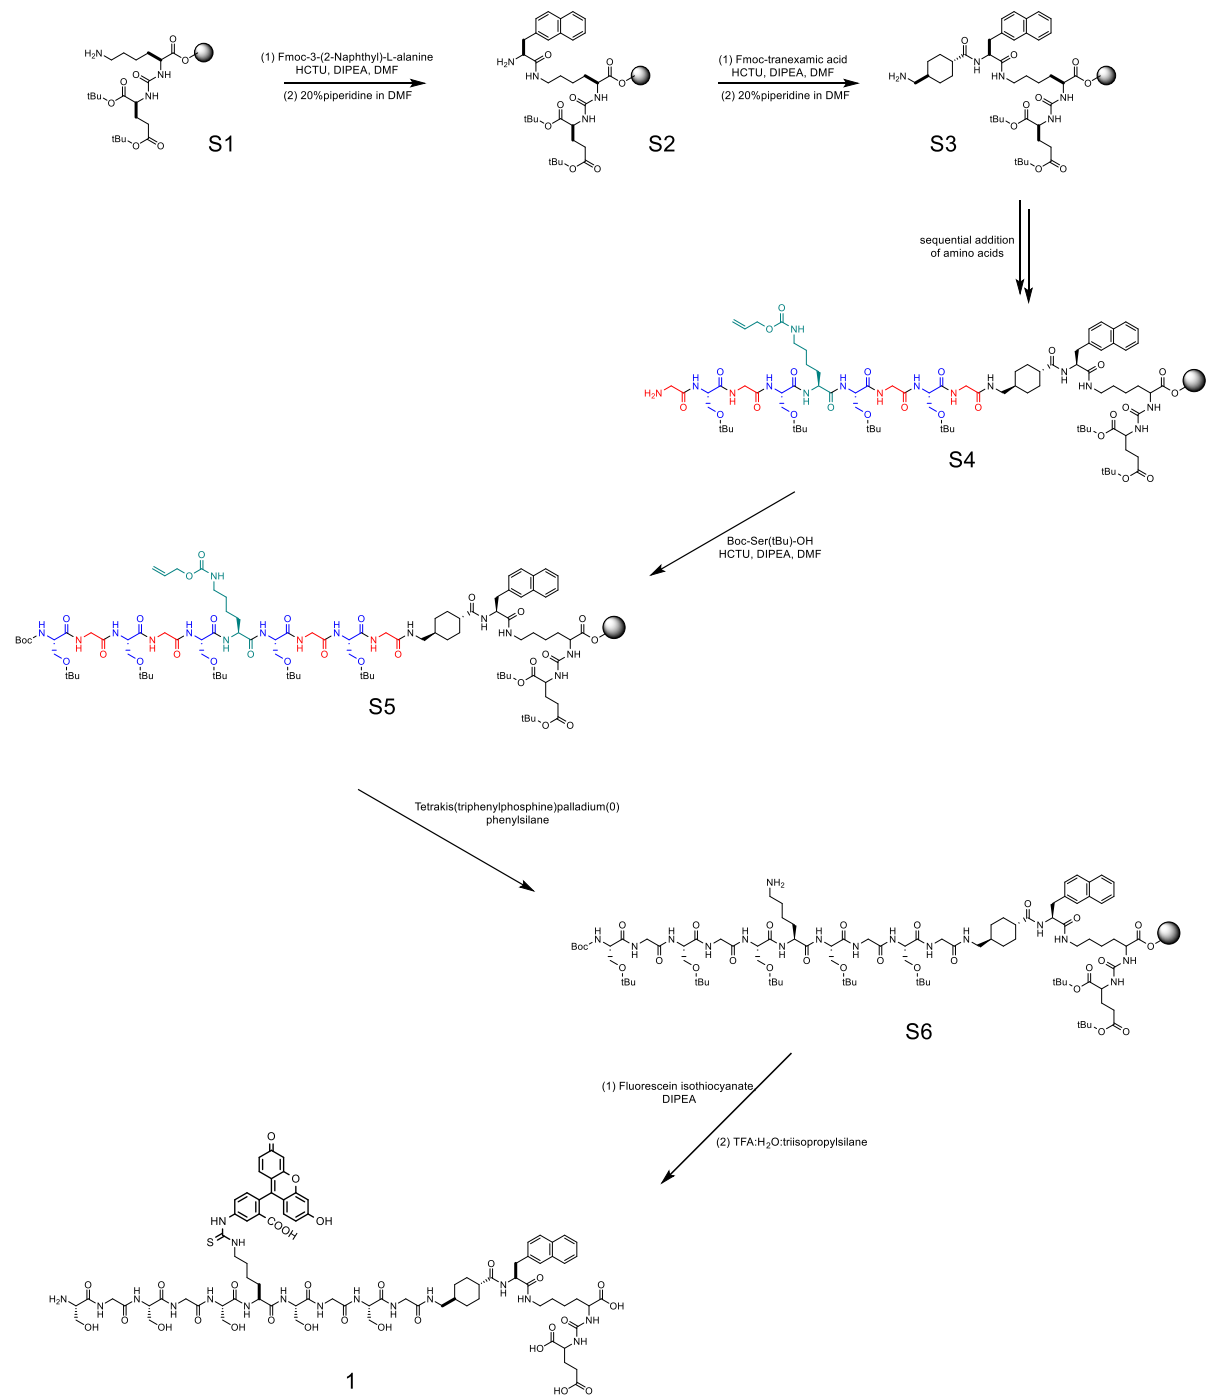

## Synthesis of the linear anti-PSMA peptide S4

Solid phase peptide synthesis (SPPS) was used for making the resin-bound short peptide, adopted from Eder et al <sup>1</sup>.

To 250 mg (0.305 mmol) of 2-chlorotrityl resin (swollen in dry DCM) was added 276 mg (0.61 mmol) of Fmoc-Lys(Alloc)-OH and 266  $\mu$ L (1.53 mmol) of DIPEA (both dissolved in 3 mL of dry DCM). The mixture was left stirring at room temperature for 2 hours. The solution was then filtered out and the resin was washed two times with dry DCM followed by two washes (10 min each) with the capping solution DCM:MeOH:DIPEA (18:1.5:1.5 v/v). The resin was washed successively with DMF (5 x 2min), DCM, and MeOH (3 x 2min each) and dried under vacuum. The loading capacity of the resin was then quantified and found to be 0.67 mmol.g<sup>-1</sup>.

The Fmoc group was then cleaved off by swelling the resin in DMF for 30 min and washing with 20% piperidine in DMF (5 x 2min). The resin was then washed successively with DMF (5 x 2min), DCM, and MeOH (3 x 2min each) and dried under vacuum.

For synthesising the glutamyl residue, the isocyanate species was generated in situ as follows: to an ice-cold solution of triphosgene (188 mg, 0.633 mmol) in 5 mL dry DCM was slowly added a mixture of H-Glu(OtBu)-OtBu (562 mg, 1.9 mmol) and DIPEA (1 ml) in 30 mL of dry DCM. The mixture was left stirring on ice for an hour followed by 2 hours at room temperature. The resin (315 mg, equating to 0.211 mmol of Fmoc-Lys(Alloc)-OH) was then added to the solution which was gently stirred overnight. The solution was then filtered out and the Alloc group was cleaved off by agitating the resin with tetrakis(triphenylphosphine)palladium(0) (61 mg, 0.053 mmol) and morpholine (469  $\mu$ L, 5.3 mmol) in DCM. The resin was then washed with DCM (5 x 2 min) then MeOH (3 x 2 min) and dried under vacuum. The rest of the anti-PSMA moiety was synthesised using standard Fmoc chemistry: Fmoc-3-(2-Naphthyl)-L-alanine (461 mg, 1.05 mmol), HCTU (436 mg, 1.05 mmol), and DIPEA (404  $\mu$ L, 2.32 mmol) were dissolved in 3 mL of DMF and the solution added to the resin. This mixture was gently agitated for 1 hour, then the resin was filtered and washed with DMF (3 x 2min). Fmoc deprotection was achieved by agitating the resin with a solution of 20% piperidine in DMF (5 x 2min). The resin was washed with DMF (5 x 2min) prior to the next coupling. The above steps were repeated for the addition of Fmoc-tranexamic acid (399 mg, 1.05 mmol).

A test cleavage was carried out on **S3** after addition of the tranexamic acid, with characterisation by HPLC-MS.

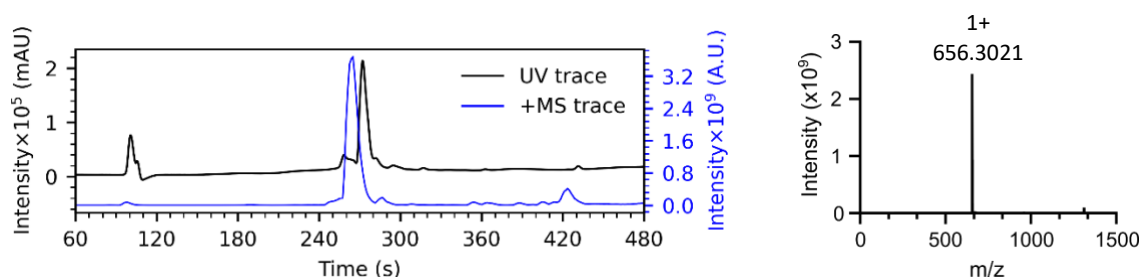

**Figure S2.** UV Abs 210-400 nm chromatogram with MS trace (left) and mass spectrum (right) of **S3** test cleavage analysed by HPLC-MS. ESI: Found  $[M+H]^+$  656.3021,  $C_{33}H_{46}N_5O_9^+$  requires 656.3290.

The rest of the linear peptide **S4** was synthesised as above using the following order of the amino acids (1.05 mmol each): Fmoc-Glycine, Fmoc-Serine, Fmoc-Glycine, Fmoc-Serine, Fmoc-Lysine (Alloc), Fmoc-Serine, Fmoc-Glycine, Fmoc-Serine, Fmoc-Glycine.

The resin was finally washed with DCM, and MeOH (3 x 2min each) and was then dried under vacuum.

### Synthesis of fluorescent anti-PSMA peptide **1**

115 mg (0.077 mmol) of the linear anti-PSMA peptide resin **S4** was swollen in DMF for 30 min. Boc-Ser(tBu)-OH (101 mg, 0.385 mmol), HCTU (160 mg, 0.385 mmol), and DIPEA (148  $\mu$ L, 0.847 mmol) were dissolved in 3 mL of DMF and added to the resin which was gently agitated for 1 hour. The solvent was then removed and the resin was washed with DMF (5 x 2min) and DCM (3 x 2min). The Alloc group was cleaved off by gently agitating the resin with tetrakis(triphenylphosphine)palladium(0) (22 mg, 0.019 mmol) and morpholine (170  $\mu$ L, 1.92 mmol) in DCM for 1h. The resin was then washed with DCM and DMF (5 x 2min each) and filtered.

60 mg (0.154 mmol) of fluorescein isothiocyanate isomer I and 148  $\mu$ L (0.847 mmol) of DIPEA was dissolved in 3 mL of DMF and added to the resin. The mixture was gently agitated in the dark overnight. The resin was then washed with DMF (5 x 2min) followed by DCM and MeOH (3 x 2min each) and was dried under vacuum overnight.

The target peptide was then cleaved off the resin by gently agitating the resin with a mixture of 95:2.5:2.5 (v/v) of TFA:H<sub>2</sub>O:triisopropylsilane for 1 hour. The solution was added to ice-cold Et<sub>2</sub>O to precipitate the peptide which was then centrifuged at 4000rpm 4°C for 10 min to give a pellet. The pellet was washed with cold Et<sub>2</sub>O and centrifuged 3 times, then dissolved in 10% aq. acetic acid and freeze-dried overnight.

A final purification step was performed by dissolving the peptide in LC-MS grade water and loading it on a C18 solid-phase extraction (SPE) cartridge. The target peptide was eluted with 40% MeCN in water. The solution was lyophilised to give a bright yellow residue **1** (114 mg, 80%). HRMS-ESI: Found [M+2Na]<sup>2+</sup> 940.8344, C<sub>83</sub>H<sub>105</sub>N<sub>17</sub>Na<sub>2</sub>O<sub>29</sub>S<sup>2+</sup> requires 940.8385.

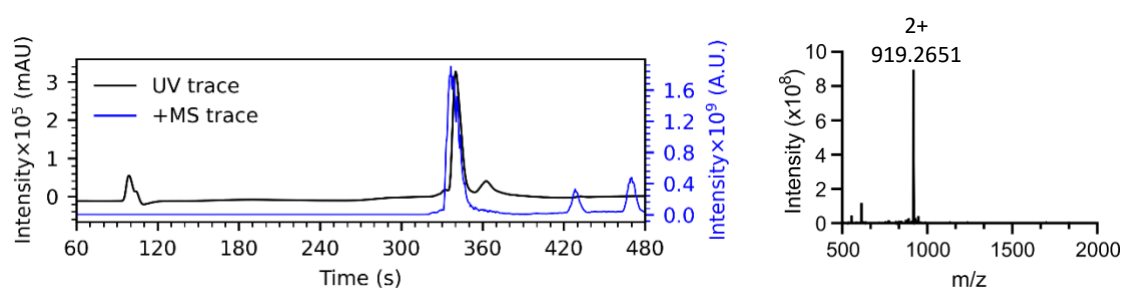

**Figure S3.** UV Abs 210-400 nm chromatogram with MS trace (left) and mass spectrum (right) of **1** measured by HPLC-MS. LRMS (ESI-pos): Found [M+2H]<sup>+2</sup> 919.2651, C<sub>83</sub>H<sub>106</sub>N<sub>17</sub>O<sub>29</sub>S<sup>2+</sup> requires 918.3529.

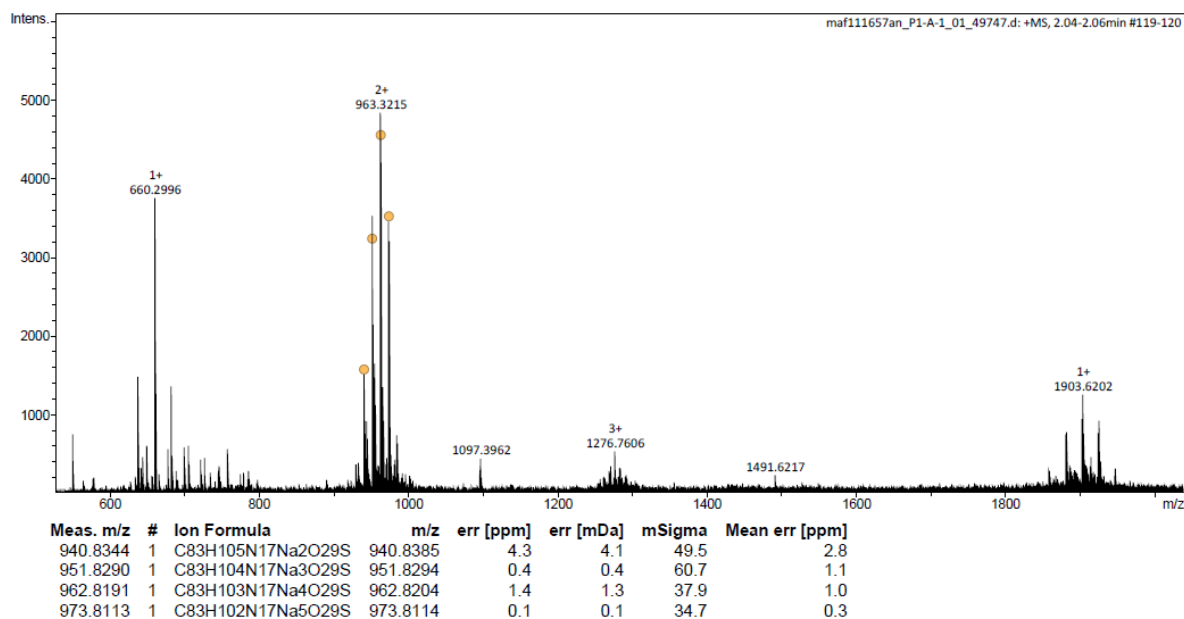

**Figure S4** HRMS-ESI of **1**

### **Binding of Fluorescent anti-PSMA peptide 1 to prostate cancer cell lines (Figure 2B)**

LNCaP and PC3 cells were detached using 10 mM EDTA in PBS, washed, re-suspended in ice cold PBS and plated in a 96 well plate at 75,000 cells per well. Cells were incubated for 1.5 hour at 4 °C with **1** at serial dilutions (1:3) of 50 µg/ml –  $2.9 \times 10^{-8}$  µg mL<sup>-1</sup>. Cells were then washed, fixed overnight in FACS buffer (PBS 1% FCS, 0.05% sodium azide) containing 1% formaldehyde and resuspended in FACS buffer for analysis on a Cytoflex S (Beckmann Coulter). A Live/Dead stain was used on cells only for gating purposes. Median fluorescent units of cells only were subtracted from cells plus peptide giving specific fluorescent units. Data was analysed using GraphPad Prism, One site – Specific binding. The Kd was 0.1663 ng/ml, 0.085 nM.

### Supplementary Figure 5, Synthesis of DBCO anti-PSMA peptide 3

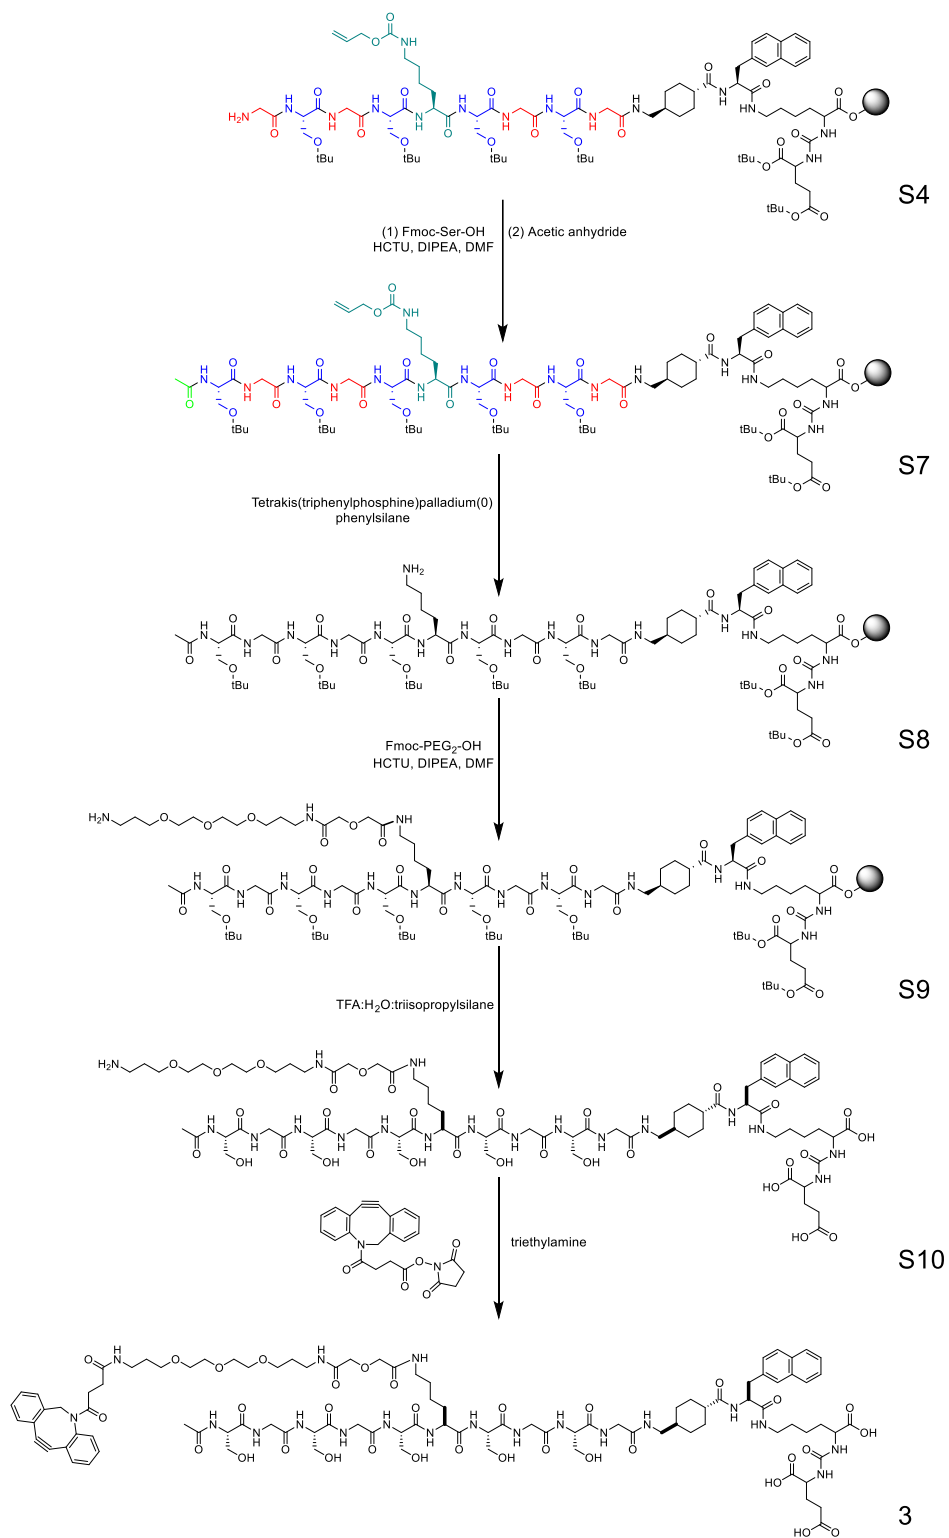

## Synthesis of anti-PSMA peptide precursor **S10**

Synthesis of the linear peptide was repeated from **S1** (0.152 mmol) which was swollen in DMF. Then Fmoc-Ser(tBu)-OH (291.4 mg 0.76 mmol), HCTU (314 mg, 0.76 mmol), and DIPEA (293  $\mu$ l, 1.67 mmol) were dissolved in 3 mL of DMF and added to the resin which was gently agitated for 1 hour. The solvent was removed and the resin was washed with DMF (5 x 2min). Fmoc deprotection was achieved by agitating the resin with a solution of 20% piperidine in DMF (5 x 2min). The resin was washed with DMF (5 x 2min) and capped with acetic anhydride (84.5  $\mu$ l, 0.89 mmol), HCTU (314 mg, 0.76 mmol) and DIPEA (140  $\mu$ l, 0.8 mmol).

The resin was then washed with DMF (5 x 2min) and DCM (3 x 2min). The Alloc group was cleaved off by gently agitating the resin with tetrakis(triphenylphosphine)palladium(0) (44 mg, 0.038 mmol) and phenylsilane (468  $\mu$ l, 3.8 mmol) in DCM for 1h. The resin was then washed with DCM and DMF (5 x 2min each) and filtered. The resin was shrunk by washing with DCM (3x 2min) and MeOH (3x 2min) with rotation. The resin was dried initially on a vacuum manifold and then on high vacuum line overnight.

Roughly one third of this resin was taken and swollen in DMF for 30 min. Fmoc-PEG<sub>2</sub>-OH (131 mg, 0.234 mmol), HCTU (97 mg, 0.233 mmol) and DIPEA (95  $\mu$ l, 0.515 mmol) were dissolved in 1 ml DMF and added to the resin which was gently agitated for 2 hours. The resin was then washed with DMF (5 x 2min) followed by DCM and MeOH (3x 2min each) and was dried under vacuum overnight.

The target peptide was then cleaved off the resin by gently agitating the resin with a mixture of 95:2.5:2.5 (v/v) of TFA:H<sub>2</sub>O:triisopropylsilane for 1 hour. The solution was added to ice-cold Et<sub>2</sub>O to precipitate the peptide which was then centrifuged at 4000 rpm 4°C for 10 min to give a pellet. The pellet was washed with cold Et<sub>2</sub>O and centrifuged 3 times, then dissolved in 10% aq. acetic acid and freeze-dried overnight affording a colourless solid **S10**. HRMS-ESI: found [M+H+Na]<sup>2+</sup> 915.4205, C<sub>78</sub>H<sub>123</sub>N<sub>18</sub>NaO<sub>31</sub><sup>2+</sup> requires 915.4244.

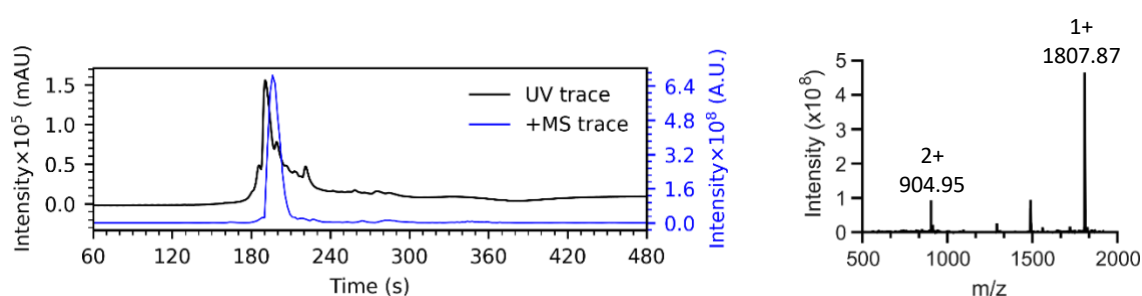

**Figure S6.** UV Abs 210-400 nm chromatogram with MS trace (left) and mass spectrum (right) of **S10** analysed by HPLC-MS. LRMS (ESI-pos): Found [M+H]<sup>+</sup> 1807.87, C<sub>78</sub>H<sub>123</sub>N<sub>18</sub>O<sub>31</sub><sup>+</sup> requires 1807.86,

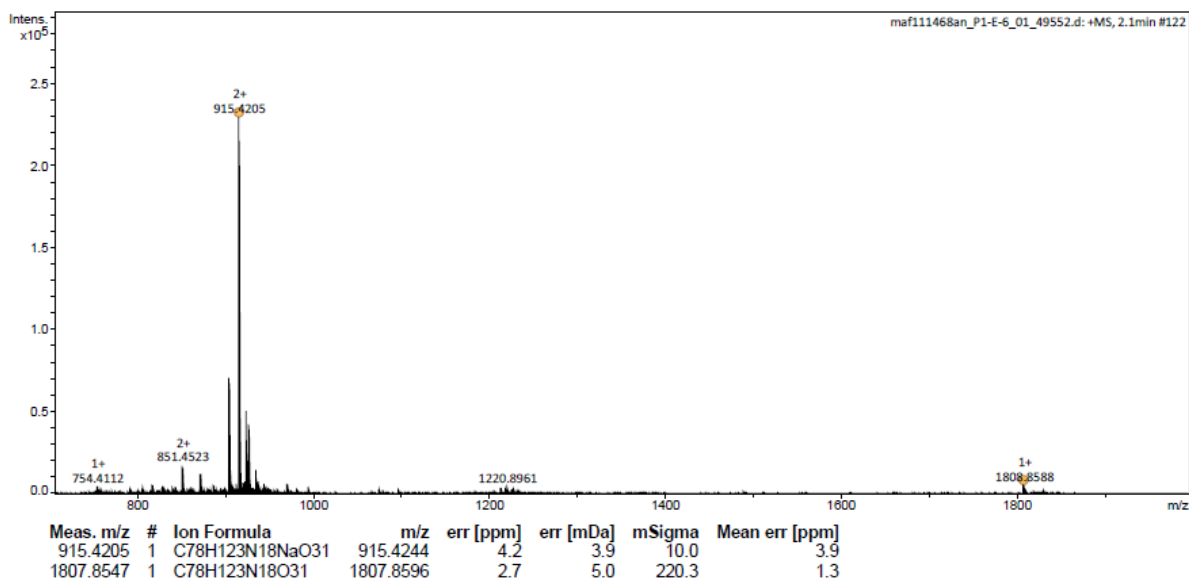

**Figure S7** ESI HRMS of **S10**

### Synthesis of anti-PSMA DBCO peptide **3**

To 583  $\mu$ l of a 3.3 mM solution of anti-PSMA PEG peptide **S10** in anhydrous DMF was added 3 equivalents of DBCO NHS ester (Sigma 761524) (159  $\mu$ l of a 50 mM stock in DMF) and 1  $\mu$ l of triethylamine. The resultant solution was stirred at room temperature overnight after which time it was diluted with water and lyophilised. The lyophilised material was re-suspended in 5% DMF/water (2 ml), centrifuged and the supernatant was applied to a C18 column prewashed with methanol and then water. The column was eluted with a water/acetonitrile gradient. Fractions were checked by LCMS (**Figure S8**), the product **3** eluted in 40% acetonitrile/water and lyophilised to afford a colourless solid.

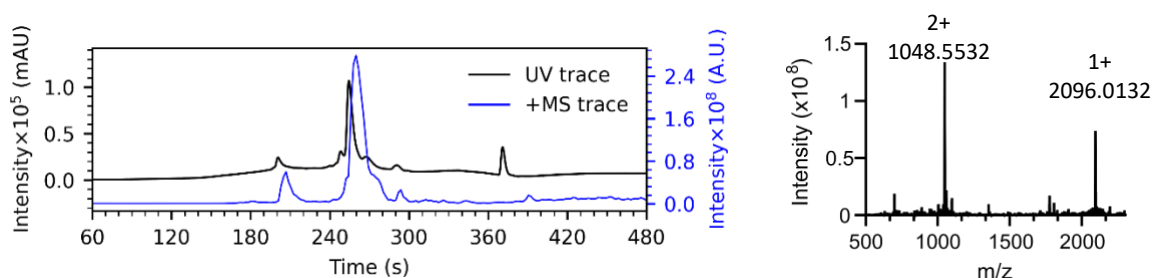

**Figure S8.** UV Abs 210-400 nm chromatogram with MS trace (left) and mass spectrum (right) of **3** measured by LC-MS. LRMS (ESI-pos): Found  $[M+H]^+$  2096.0132, C<sub>97</sub>H<sub>136</sub>N<sub>19</sub>O<sub>33</sub><sup>+</sup> requires 2095.9576, Found  $[M+H]^{2+}$  1048.5532, C<sub>97</sub>H<sub>136</sub>N<sub>19</sub>O<sub>33</sub><sup>2+</sup> requires 1048.4825



### Calculation of the number of azides on PEI25K-g(20)-PEG3.4K-N3

A series of DMSO solutions were prepared such that the final volumes were 1 mL and the quantities of azide functionalised polymer **2** (PEI25K-g(20)-PEG3.4K-N3, Nanosoft Polymers) and DBCO-acid added to each solution were known. This enabled the concentrations of each of these species in the solution to be calculated. One series of solutions contained both DBCO-acid and polymer (see Table S1 below), whereas the other series lacked polymer but contained akin concentrations of DBCO-acid (see Table S2 below). The solutions were incubated overnight at rt in darkness, after which time the UV-vis spectra of the solutions were recorded.

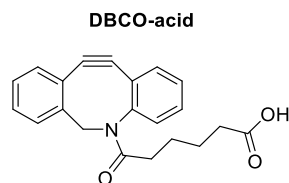

Unreacted DBCO absorbs strongly at 313 nm, whereas the triazole product of the reaction of DBCO with an azide does not. By comparing the absorbance at 313 nm between comparable solutions in the two series, it is therefore possible to obtain a value for  $\Delta Abs_{313\text{ nm}}$ . This value could then be used to determine much DBCO-acid has been consumed in each “Polymer and DBCO-acid” solution using the Beer–Lambert law  $Abs = \epsilon cl$ , where  $\epsilon_{DBCO\text{ acid at }313\text{ nm}}$  was determined experimentally to be  $14000\text{ dm}^3\text{ mol}^{-1}\text{ cm}^{-1}$ , and  $l$  was 1 cm.

$$\Delta Abs_{313\text{ nm}} = (Abs_{313\text{ nm}}\text{ Polymer and DBCOacid}) - (Abs_{313\text{ nm}}\text{ DBCOacid only})$$

$$[DBCO\text{ consumed}] = - \frac{\Delta Abs_{313\text{ nm}}}{\epsilon_{DBCO\text{ acid at }313\text{ nm}}}$$

We define the equivalents of DBCO delivered to the “Polymer and DBCO-acid” solutions as

$$\text{Equivalents of DBCO delivered} = \frac{[DBCO\text{ delivered}]}{[Polymer]}$$

and we define the equivalents of DBCO consumed per polymer chain as

$$\text{Equivalents of DBCO consumed} = \frac{[DBCO\text{ consumed}]}{[Polymer]}$$

Ideally, the maximum equivalents of DBCO that could be consumed per polymer chain would be expected to equate to the quantity of azides present on each polymer chain. After DBCO is delivered to the polymer solutions and the resultant solutions are incubated for a fixed time period, the equivalents of DBCO consumed will therefore tend towards the number of azides present on each polymer chain. This behaviour will take the form of an exponential function of the equivalents of DBCO that were delivered to the “Polymer and DBCO-acid” solutions:

$$\text{Equivs of DBCO consumed} = A(1 - e^{-\beta(\text{Equivs of DBCO delivered})})$$

Where A = the number of azides available for reaction per polymer chain, and  $\beta$  is an undefined pre-exponential factor.

Non-linear regression of a plot of *Equivs of DBCO consumed* vs *Equivs of DBCO delivered* can therefore be used to determine the value of A, and by extension, the number of azides available for reaction per polymer chain.

**Table S1:** The concentrations of species present in samples of Polymer and DBCO-acid in DMSO, and the absorbance of these solutions at 313 nm.

| Polymer and DBCO-acid sample | Concentration of Polymer / $\mu\text{M}$ | DBCO-acid concentration delivered / $\mu\text{M}$ | Abs <sub>313 nm</sub> |
|------------------------------|------------------------------------------|---------------------------------------------------|-----------------------|
| 1 (Only Polymer in DMSO)     | 0.571                                    | 0                                                 | 0.005                 |
| 2                            | 0.571                                    | 3.599                                             | 0.012                 |
| 3                            | 0.571                                    | 7.199                                             | 0.030                 |
| 4                            | 0.571                                    | 10.798                                            | 0.033                 |
| 5                            | 0.571                                    | 14.398                                            | 0.042                 |
| 6                            | 0.571                                    | 17.997                                            | 0.052                 |
| 7                            | 0.571                                    | 21.597                                            | 0.076                 |
| 8                            | 0.571                                    | 25.196                                            | 0.099                 |
| 9                            | 0.571                                    | 28.796                                            | 0.118                 |
| 10                           | 0.571                                    | 32.395                                            | 0.158                 |
| 11                           | 0.571                                    | 35.995                                            | 0.186                 |
| 12                           | 0.571                                    | 39.594                                            | 0.219                 |
| 13                           | 0.571                                    | 43.194                                            | 0.254                 |
| 14                           | 0.571                                    | 46.793                                            | 0.282                 |
| 15                           | 0.571                                    | 50.393                                            | 0.321                 |
| 16                           | 0.571                                    | 53.992                                            | 0.366                 |
| 17                           | 0.571                                    | 57.592                                            | 0.402                 |
| 18                           | 0.571                                    | 61.191                                            | 0.455                 |
| 19                           | 0.571                                    | 64.791                                            | 0.504                 |
| 20                           | 0.571                                    | 68.390                                            | 0.539                 |
| 21                           | 0.571                                    | 71.990                                            | 0.582                 |
| 22                           | 0.571                                    | 75.589                                            | 0.631                 |
| 23                           | 0.571                                    | 79.189                                            | 0.661                 |
| 24                           | 0.571                                    | 82.788                                            | 0.725                 |
| 25                           | 0.571                                    | 86.388                                            | 0.753                 |
| 26                           | 0.571                                    | 89.987                                            | 0.811                 |
| 27                           | 0.571                                    | 93.587                                            | 0.851                 |
| 28                           | 0.571                                    | 97.186                                            | 0.890                 |
| 25 (diluted 1 in 2)          | 0.286                                    | 43.194                                            | 0.385                 |
| 26 (diluted 1 in 2)          | 0.286                                    | 44.994                                            | 0.412                 |
| 28 (diluted 1 in 2)          | 0.286                                    | 48.593                                            | 0.460                 |



**Table S2:** The concentrations of samples of DBCO-acid in DMSO and their absorbance values at 313 nm.

| DBCO-acid sample    | DBCO-acid concentration / $\mu\text{M}$ | Abs <sub>313 nm</sub> |
|---------------------|-----------------------------------------|-----------------------|
| 1 (Only DMSO)       | 0.000                                   | 0.000                 |
| 2                   | 3.599                                   | 0.054                 |
| 3                   | 7.199                                   | 0.108                 |
| 4                   | 10.798                                  | 0.165                 |
| 5                   | 14.398                                  | 0.212                 |
| 6                   | 17.997                                  | 0.264                 |
| 7                   | 21.597                                  | 0.311                 |
| 8                   | 25.196                                  | 0.366                 |
| 9                   | 28.796                                  | 0.420                 |
| 10                  | 32.395                                  | 0.458                 |
| 11                  | 35.995                                  | 0.526                 |
| 12                  | 39.594                                  | 0.565                 |
| 13                  | 43.194                                  | 0.618                 |
| 14                  | 46.793                                  | 0.655                 |
| 15                  | 50.393                                  | 0.706                 |
| 16                  | 53.992                                  | 0.754                 |
| 17                  | 57.592                                  | 0.797                 |
| 18                  | 61.191                                  | 0.840                 |
| 19                  | 64.791                                  | 0.884                 |
| 20                  | 68.390                                  | 0.932                 |
| 21                  | 71.990                                  | 0.973                 |
| 22                  | 75.589                                  | 1.027                 |
| 23                  | 79.189                                  | 1.061                 |
| 24                  | 82.788                                  | 1.103                 |
| 25                  | 86.388                                  | 1.159                 |
| 26                  | 89.987                                  | 1.189                 |
| 27                  | 93.587                                  | 1.223                 |
| 28                  | 97.186                                  | 1.244                 |
| 25 (diluted 1 in 2) | 43.194                                  | 0.629                 |
| 26 (diluted 1 in 2) | 44.994                                  | 0.652                 |
| 28 (diluted 1 in 2) | 48.593                                  | 0.716                 |

#### Synthesis of anti-PSMA polymer 4

A 1 mM solution of **3** in DMSO was prepared alongside a 20  $\mu\text{M}$  solution of PEI25K-g(20)-PEG3.4K-N<sub>3</sub> **2** (Nanosoft Polymers) in DMSO. 100  $\mu\text{L}$  reactions were set up as detailed in **Table S3** below and incubated at room temperature overnight. The following day reactions were diluted with water to less than 10% DMSO and dialysed into water before freeze drying. Reactions were monitored by UV-vis (**Figure 4B**).

**Table S3.** Concentrations and volumes required for setting up 100  $\mu$ l reactions

| Sample | Volume of 1 mM DBCO solution delivered / $\mu$ l | Volume of 20 $\mu$ M polymer solution delivered / $\mu$ l | Additional DMSO added / $\mu$ l | Final concentration of DBCO / $\mu$ M | Final conc of polymer / $\mu$ M | Equiv Of DBCO to polymer |
|--------|--------------------------------------------------|-----------------------------------------------------------|---------------------------------|---------------------------------------|---------------------------------|--------------------------|
| 1      | 30                                               | 0                                                         | 70                              | 300                                   |                                 |                          |
| 2      | 30                                               | 50                                                        | 20                              | 300                                   | 10                              | 30                       |
| 3      | 15                                               | 0                                                         | 85                              | 150                                   |                                 |                          |
| 4      | 15                                               | 50                                                        | 35                              | 150                                   | 10                              | 15                       |

**GFP Transfection of LNCaP cells using anti-PSMA polyplex 5**

LNCaP cells were plated in a 6-well plate at 175,000 cells/well with 2 ml of R10 (RPMI + 10%FCS + 1% glutamine, 1% PenStrep) media /well 24 hour prior to transfection.

The freeze dried anti-PSMA polymer **4** was resuspended in OptiMem to give a solution of 3  $\mu$ g/ $\mu$ l. Each polymer has approximately 581 nitrogens/positive charges, using this information GFP (pmax-GFP from Lonza) (1  $\mu$ g/ $\mu$ l) was associated with the polymer to give N/P ratios of 40 and 10 (**Table S4**).

The GFP and anti-PSMA polymer **4** were added to OptiMem separately, gently vortexed and incubated for 10 min then combined, mixed gently and incubated for a further 15min to allow the GFP:anti-PSMA polyplex **5** to form before use. 1 ml of media was removed from cells leaving 1 ml to which was added dropwise the GFP polyplex **5** (100  $\mu$ l). This was incubated for 24 hour then media was changed and cells were harvested 96 hours post transfection using 10 mM EDTA in PBS. Cells were plated in a 96 well plate, spun, washed with FACS buffer (PBS 1% FCS, 0.05% sodium azide) and analysed by Flow Cytometry on a CytoFlexS on the same day as harvesting.

**Table S4.** Volume of stocks to use for preparation of **5**

| $\mu$ l of GFP stock 1 $\mu$ g/ $\mu$ l added to 50 $\mu$ l of OptiMem | $\mu$ l of anti-PSMA polymer <b>4</b> stock (3 $\mu$ g/ $\mu$ l) added to 50 $\mu$ l of OptiMem | N/P ratio when both solns are combined |
|------------------------------------------------------------------------|-------------------------------------------------------------------------------------------------|----------------------------------------|
| 1                                                                      | 5                                                                                               | 10                                     |
| 1                                                                      | 20                                                                                              | 40                                     |

**Blocking of anti-PSMA prior to transfection (Figure 5B)**

Cells and GFP:anti-PSMA polyplexes were prepared as above however 60 min prior to transfection, anti-PSMA PEG peptide **S10** (6  $\mu$ M in media) was added to cells to block the PSMA. After this time the experiment proceeded as above.

**Increased Concentration - GFP Transfection of LNCaP cells using anti-PSMA polyplex 5, (Figure 5C)**

GFP Transfection was repeated as above and also with 3  $\mu$ g DNA and 60  $\mu$ l of anti-PSMA polymer stock (3  $\mu$ g/ml) in a total final volume of 100  $\mu$ l of OptiMem.

**Figure S9.** 700MHz  $^1\text{H}$ -NMR analysis of anti-PSMA polymer **4** synthesised using 30 equiv. of DBCO anti-PSMA peptide **3**

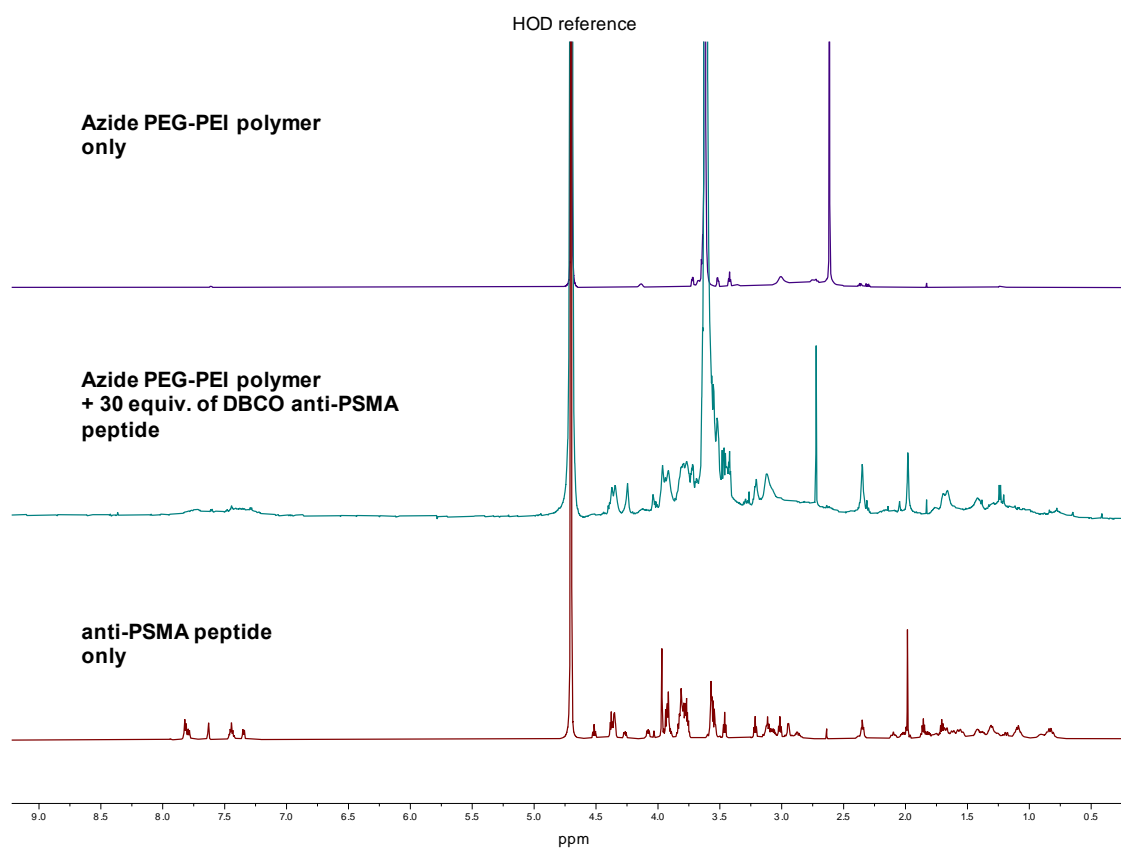

**Figure S10.** Expansion (3.2-4.5 ppm) of 700MHz  $^1\text{H}$ -NMR analysis of anti-PSMA polymer **4** synthesised using 30 equiv. of DBCO anti-PSMA peptide **3**

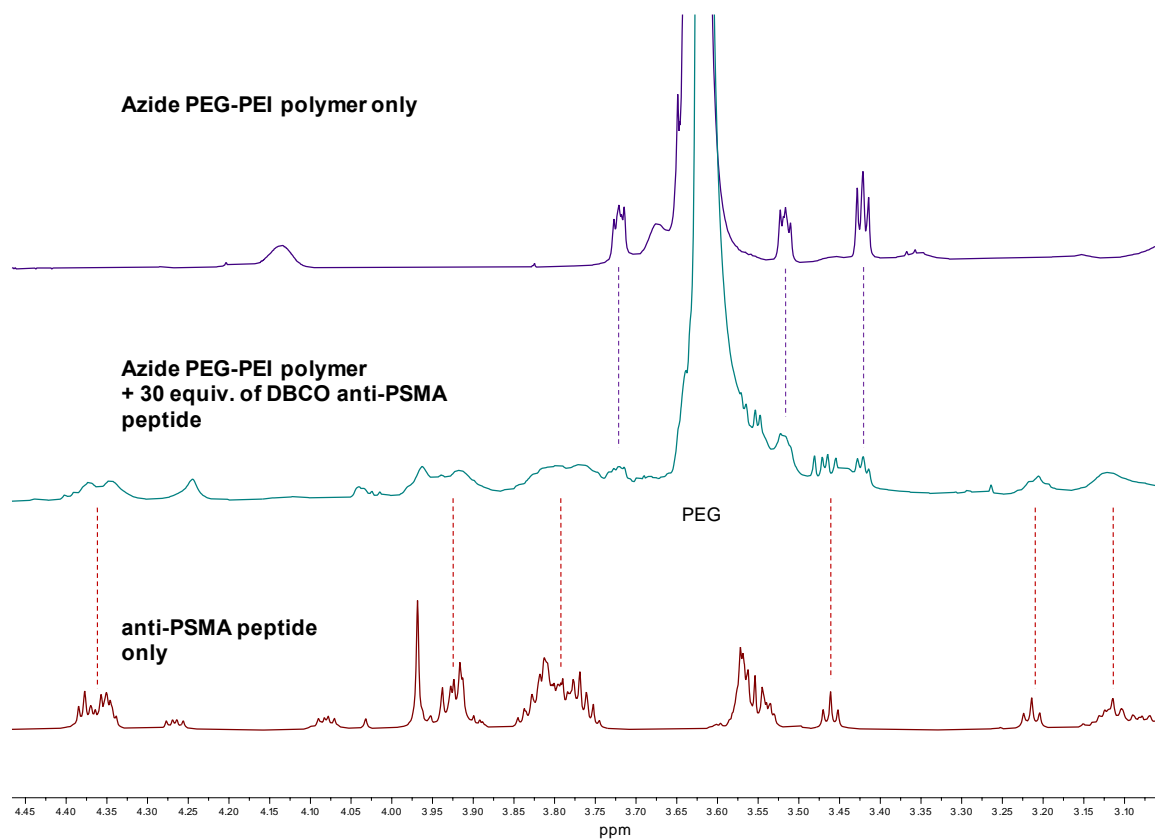

**Figure S11.** Expansion (3.3-8.0 ppm) of 700MHz  $^1\text{H}$ -NMR analysis of anti-PSMA polymer **4** synthesised using 30 equiv. of DBCO anti-PSMA peptide **3**

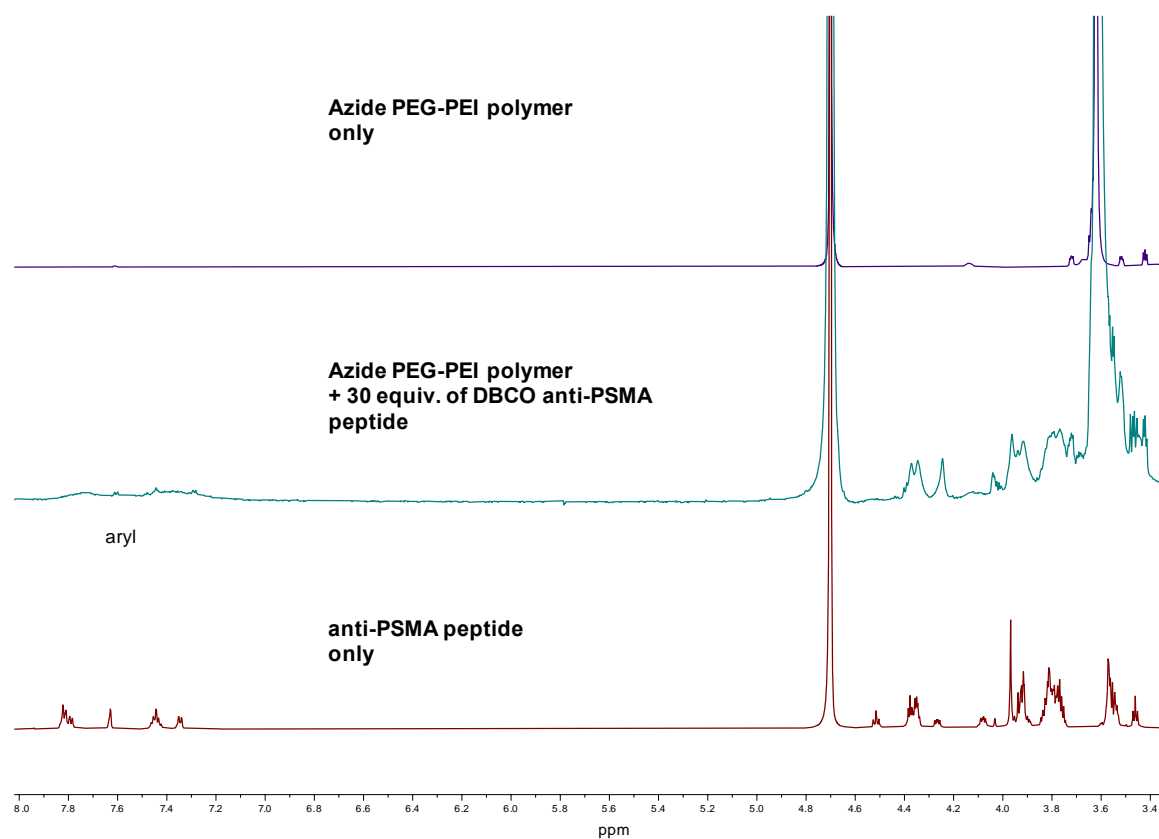



## References

- 1 Eder, M. *et al.*  $^{68}\text{Ga}$ -Complex Lipophilicity and the Targeting Property of a Urea-Based PSMA Inhibitor for PET Imaging. *Bioconjugate Chemistry* **23**, 688-697 (2012).
